# Supplementary material
Source: MDPI journal article supplement (https://www.mdpi.com/2072-4292/13/18/3779)
Supplement: s1 [file s1]

**Table S1.** Tropical systems that passed within 200 km of the northern Chandeleur Islands study area between 1979 and 2019. [Abbreviation: TS, tropical storm]

| Storm Name           | Landfall    | Intensity <sup>1</sup> | Distance from study area |
|----------------------|-------------|------------------------|--------------------------|
| Hurricane Bob        | 11-Jul-1979 | 1                      | <160 km W                |
| Hurricane Frederic   | 13-Sep-1979 | 4                      | <40 km E                 |
| Hurricane Elena      | 02-Sep-1985 | 3                      | ≤40 km NE                |
| Tropical Storm Juan  | 31-Oct-1985 | TS                     | ~40 km SE                |
| Hurricane Florence   | 10-Sep-1988 | 1                      | ~80 km SW                |
| Hurricane Opal       | 04-Oct-1995 | 4                      | <160 km SE               |
| Hurricane Danny      | 18-Jul-1997 | 1                      | <40 km S                 |
| Hurricane Georges    | 28-Sep-1998 | 2                      | <40 km E                 |
| Tropical Storm Hanna | 14-Sep-2002 | TS                     | 0 km                     |
| Hurricane Isidore    | 26-Sep-2002 | TS                     | <160 km E                |
| Hurricane Ivan       | 16-Sep-2004 | 3                      | <120 km E                |
| Hurricane Cindy      | 06-Jul-2005 | 1                      | <120 km W                |
| Hurricane Katrina    | 29-Aug-2005 | 4                      | <120 km W                |
| Hurricane Gustav     | 01-Sep-2008 | 2                      | ~200 km SW               |
| Hurricane Ida        | 10-Nov-2009 | 1                      | ~120 km S                |
| Hurricane Isaac      | 28-Aug-2012 | 1                      | ~120 km SW               |
| Hurricane Nate       | 08-Oct-2017 | 1                      | <40 km W                 |

<sup>1</sup> Maximum intensity within 200 km of study area.

**Table S2.** Spectral bands for Landsat 5 Thematic Mapper (TM), 7 Enhanced Thematic Mapper Plus (ETM+), and 8 Operational Land Imaging (OLI) sensors used in this study. All bands are 30-m resolution except for the thermal-infrared band, which is acquired at 60- to 120-m resolution and resampled to 30 m prior to distribution. [Abbreviations: N/A, not applicable; SWIR, short-wave infrared]

| Spectral Range   | Band (TM, ETM+) | Wavelength (μm) | Band (OLI)      | Wavelength (μm) |
|------------------|-----------------|-----------------|-----------------|-----------------|
| Coastal aerosol  | N/A             | N/A             | 1               | 0.43-0.45       |
| Visible blue     | 1               | 0.45-0.52       | 2               | 0.45-0.51       |
| Visible green    | 2               | 0.52-0.60       | 3               | 0.53-0.59       |
| Visible red      | 3               | 0.63-0.69       | 4               | 0.64-0.67       |
| Near infrared    | 4               | 0.76-0.90       | 5               | 0.85-0.88       |
| SWIR 1           | 5               | 1.55-1.75       | 6               | 1.57-1.65       |
| Thermal Infrared | 6               | 10.40-12.50     | 10 <sup>1</sup> | 10.6-11.19      |
| SWIR 2           | 7               | 2.08-2.35       | 7               | 2.11-2.29       |
| Panchromatic     | 8 <sup>2</sup>  | 0.52-0.90       | 8               | 0.53-0.59       |
| Cirrus           | N/A             | N/A             | 9               | 1.36-1.38       |

<sup>1</sup> Landsat 8 OLI thermal infrared band 11 (11.50-12.51 μm) was not used in this study.

<sup>2</sup> Panchromatic band N/A on Landsat 5 TM sensor.

**Table S3.** Source image-acquisition dates used to create reference datasets used in accuracy assessment.  
[Abbreviations: NLCD, National Land Cover Dataset; BICM, Barrier Island Comprehensive Monitoring program]

| Dataset   | Image Date(s)              |
|-----------|----------------------------|
| BICM 2016 | 11-Oct-2016 to 30-Oct-2016 |
| NLCD 2016 | 18-Jan-2016; 30-Sep-2016   |
| NLCD 2013 | 24-Oct-2013                |
| NLCD 2011 | 16-Aug-2011; 3-Oct-2011    |
| BICM 2008 | 28-Oct-2008; 29-Oct-2008   |
| NLCD 2008 | 26-Oct-2008                |
| NLCD 2006 | 18-Oct-2005                |
| BICM 2005 | 17-Nov-2005                |
| NLCD 2004 | 15-Oct-2004                |
| BICM 2004 | 20-Jan-2004                |
| NLCD 2001 | 17-Jun-2001; 15-Oct-2001   |
| BICM 1998 | 24-Jan-1998                |

**Table S4.** Confusion matrices showing results of accuracy assessment comparing the water, bare earth (sand), and vegetated classes from land-cover datasets generated in this study with temporally consistent NLCD and BICM datasets at the northern Chandeleur Islands. [Abbreviations: User\_A, user's accuracy; Producer\_A, producer's accuracy]

|                              |                              |       |            |           |       |        |
|------------------------------|------------------------------|-------|------------|-----------|-------|--------|
| Classed Data:<br>17-Nov-2016 | Reference Dataset: BICM 2016 |       |            |           |       |        |
|                              | Class                        | Water | Bare Earth | Vegetated | Total | User_A |
|                              | Water                        | 100   | 0          | 0         | 100   | 100.0% |
|                              | Bare Earth                   | 36    | 57         | 7         | 100   | 57.0%  |
|                              | Vegetated                    | 32    | 3          | 65        | 100   | 65.0%  |
|                              | Total                        | 168   | 60         | 72        | 300   |        |
|                              | Producer_A                   | 59.5% | 95.0%      | 90.3%     |       | 74.0%  |
| Classed Data:<br>17-Nov-2016 | Reference Dataset: NLCD 2016 |       |            |           |       |        |
|                              | Class                        | Water | Bare Earth | Vegetated | Total | User_A |
|                              | Water                        | 98    | 1          | 1         | 100   | 98.0%  |
|                              | Bare Earth                   | 12    | 69         | 19        | 100   | 69.0%  |
|                              | Vegetated                    | 48    | 11         | 41        | 100   | 41.0%  |
|                              | Total                        | 158   | 81         | 61        | 300   |        |
|                              | Producer_A                   | 62.0% | 85.2%      | 67.2%     |       | 69.3%  |
| Classed Data:<br>18-Jan-2016 | Reference Dataset: BICM 2016 |       |            |           |       |        |
|                              | Class                        | Water | Bare Earth | Vegetated | Total | User_A |
|                              | Water                        | 97    | 0          | 1         | 100   | 97.0%  |
|                              | Bare Earth                   | 28    | 43         | 5         | 100   | 43.0%  |
|                              | Vegetated                    | 23    | 4          | 71        | 100   | 71.0%  |
|                              | Total                        | 176   | 47         | 77        | 300   |        |
|                              | Producer_A                   | 56.3% | 91.5%      | 92.2%     |       | 71.0%  |
| Classed Data:<br>18-Jan-2016 | Reference Dataset: NLCD 2016 |       |            |           |       |        |
|                              | Class                        | Water | Bare Earth | Vegetated | Total | User_A |
|                              | Water                        | 98    | 0          | 2         | 100   | 98.0%  |
|                              | Bare Earth                   | 12    | 72         | 16        | 100   | 72.0%  |
|                              | Vegetated                    | 22    | 7          | 71        | 100   | 71.0%  |
|                              | Total                        | 132   | 79         | 89        | 300   |        |
|                              | Producer_A                   | 74.2% | 91.1%      | 79.8%     |       | 80.3%  |
| Classed Data:<br>24-Oct-2013 | Reference Dataset: NLCD 2013 |       |            |           |       |        |
|                              | Class                        | Water | Bare Earth | Vegetated | Total | User_A |
|                              | Water                        | 97    | 3          | 0         | 100   | 97.0%  |
|                              | Bare Earth                   | 30    | 42         | 28        | 100   | 42.0%  |
|                              | Vegetated                    | 21    | 3          | 76        | 100   | 76.0%  |
|                              | Total                        | 148   | 48         | 104       | 300   |        |
|                              | Producer_A                   | 65.5% | 87.5%      | 73.1%     |       | 71.7%  |

**Table S4.** Confusion matrices showing results of accuracy assessment—continued.

|                              |                              |       |            |           |       |        |
|------------------------------|------------------------------|-------|------------|-----------|-------|--------|
| Classed Data:<br>03-Oct-2011 | Reference Dataset: NLCD 2011 |       |            |           |       |        |
|                              | Class                        | Water | Bare Earth | Vegetated | Total | User_A |
|                              | Water                        | 100   | 0          | 0         | 100   | 100.0% |
|                              | Bare Earth                   | 10    | 59         | 31        | 100   | 59.0%  |
|                              | Vegetated                    | 22    | 2          | 76        | 100   | 76.0%  |
|                              | Total                        | 132   | 61         | 107       | 300   |        |
|                              | Producer_A                   | 75.8% | 96.7%      | 71.0%     |       | 78.3%  |
| Classed Data:<br>30-Jan-2009 | Reference Dataset: BICM 2008 |       |            |           |       |        |
|                              | Class                        | Water | Bare Earth | Vegetated | Total | User_A |
|                              | Water                        | 97    | 0          | 0         | 100   | 97.0%  |
|                              | Bare Earth                   | 14    | 50         | 10        | 100   | 50.0%  |
|                              | Vegetated                    | 26    | 2          | 61        | 100   | 61.0%  |
|                              | Total                        | 177   | 52         | 71        | 300   |        |
|                              | Producer_A                   | 56.5% | 96.2%      | 85.9%     |       | 70.3%  |
| Classed Data:<br>30-Jan-2009 | Reference Dataset: NLCD 2008 |       |            |           |       |        |
|                              | Class                        | Water | Bare Earth | Vegetated | Total | User_A |
|                              | Water                        | 97    | 2          | 1         | 100   | 97.0%  |
|                              | Bare Earth                   | 82    | 7          | 11        | 100   | 7.0%   |
|                              | Vegetated                    | 36    | 1          | 63        | 100   | 63.0%  |
|                              | Total                        | 215   | 10         | 75        | 300   |        |
|                              | Producer_A                   | 45.1% | 70.0%      | 84.0%     |       | 55.7%  |
| Classed Data:<br>18-Oct-2005 | Reference Dataset: NLCD 2006 |       |            |           |       |        |
|                              | Class                        | Water | Bare Earth | Vegetated | Total | User_A |
|                              | Water                        | 95    | 1          | 4         | 100   | 95.0%  |
|                              | Bare Earth                   | 49    | 6          | 45        | 100   | 6.0%   |
|                              | Vegetated                    | 44    | 4          | 52        | 100   | 52.0%  |
|                              | Total                        | 188   | 11         | 101       | 300   |        |
|                              | Producer_A                   | 50.5% | 54.5%      | 51.5%     |       | 51.0%  |
| Classed Data:<br>18-Oct-2005 | Reference Dataset: BICM 2005 |       |            |           |       |        |
|                              | Class                        | Water | Bare Earth | Vegetated | Total | User_A |
|                              | Water                        | 98    | 0          | 2         | 100   | 98.0%  |
|                              | Bare Earth                   | 46    | 0          | 47        | 100   | 0.0%   |
|                              | Vegetated                    | 46    | 0          | 52        | 100   | 52.0%  |
|                              | Total                        | 199   | 0          | 101       | 300   |        |
|                              | Producer_A                   | 49.2% | 0.0%       | 51.5%     |       | 50.0%  |



**Table S4.** Confusion matrices showing results of accuracy assessment—continued.

| Reference Dataset: NLCD 2004 |            |       |            |           |       |        |
|------------------------------|------------|-------|------------|-----------|-------|--------|
| Classed Data:<br>15-Oct-2004 | Class      | Water | Bare Earth | Vegetated | Total | User_A |
|                              | Water      | 97    | 2          | 1         | 100   | 97.0%  |
|                              | Bare Earth | 48    | 34         | 18        | 100   | 34.0%  |
|                              | Vegetated  | 53    | 6          | 41        | 100   | 41.0%  |
|                              | Total      | 198   | 42         | 60        | 300   |        |
|                              | Producer_A | 49.0% | 81.0%      | 68.3%     |       | 57.3%  |
| Reference Dataset: BICM 2004 |            |       |            |           |       |        |
| Classed Data:<br>31-Mar-2004 | Class      | Water | Bare Earth | Vegetated | Total | User_A |
|                              | Water      | 94    | 0          | 4         | 100   | 94.0%  |
|                              | Bare Earth | 24    | 64         | 3         | 100   | 64.0%  |
|                              | Vegetated  | 29    | 4          | 66        | 100   | 66.0%  |
|                              | Total      | 159   | 68         | 73        | 300   |        |
|                              | Producer_A | 60.4% | 94.1%      | 90.4%     |       | 75.3%  |
| Reference Dataset: NLCD 2001 |            |       |            |           |       |        |
| Classed Data:<br>21-Sep-2001 | Class      | Water | Bare Earth | Vegetated | Total | User_A |
|                              | Water      | 100   | 0          | 0         | 100   | 100.0% |
|                              | Bare Earth | 20    | 75         | 5         | 100   | 75.0%  |
|                              | Vegetated  | 54    | 8          | 38        | 100   | 38.0%  |
|                              | Total      | 174   | 83         | 43        | 300   |        |
|                              | Producer_A | 57.5% | 90.4%      | 88.4%     |       | 71.0%  |
| Reference Dataset: BICM 1998 |            |       |            |           |       |        |
| Classed Data:<br>17-Feb-1998 | Class      | Water | Bare Earth | Vegetated | Total | User_A |
|                              | Water      | 93    | 0          | 4         | 100   | 93.0%  |
|                              | Bare Earth | 24    | 61         | 5         | 100   | 61.0%  |
|                              | Vegetated  | 19    | 12         | 66        | 100   | 66.0%  |
|                              | Total      | 152   | 73         | 75        | 300   |        |
|                              | Producer_A | 63.2% | 83.6%      | 88.0%     |       | 74.3%  |

**Table S5.** Confusion matrices showing results of accuracy assessment comparing the water, bare earth (sand), vegetated, and intertidal classes from land-cover datasets generated in this study with temporally consistent BICM datasets at the northern Chandeleur Islands. [Abbreviations: User\_A, user's accuracy; Producer\_A, producer's accuracy]

|                              |            | Reference Dataset: BICM 2016 |       |            |           |            | User_A             |
|------------------------------|------------|------------------------------|-------|------------|-----------|------------|--------------------|
|                              |            | Class                        | Water | Bare Earth | Vegetated | Intertidal |                    |
| Classed Data:<br>17-Nov-2016 | Water      | 100                          | 0     | 0          | 0         | 100        | 100.0%             |
|                              | Bare Earth | 23                           | 57    | 7          | 13        | 100        | 57.0%              |
|                              | Vegetated  | 20                           | 3     | 65         | 12        | 100        | 65.0%              |
|                              | Intertidal | 63                           | 5     | 7          | 25        | 100        | 25.0%              |
|                              | Total      | 206                          | 65    | 79         | 50        | 400        |                    |
|                              | Producer_A | 48.5%                        | 87.7% | 82.3%      | 50.0%     |            | 61.8% <sup>1</sup> |
|                              |            | Reference Dataset: BICM 2016 |       |            |           |            | User_A             |
|                              |            | Class                        | Water | Bare Earth | Vegetated | Intertidal |                    |
| Classed Data:<br>18-Jan-2016 | Water      | 97                           | 0     | 1          | 2         | 100        | 97.0%              |
|                              | Bare Earth | 28                           | 43    | 5          | 24        | 100        | 43.0%              |
|                              | Vegetated  | 23                           | 4     | 71         | 2         | 100        | 71.0%              |
|                              | Intertidal | 32                           | 10    | 25         | 33        | 100        | 33.0%              |
|                              | Total      | 180                          | 57    | 102        | 61        | 400        |                    |
|                              | Producer_A | 53.9%                        | 75.4% | 69.6%      | 54.1%     |            | 61.0% <sup>1</sup> |
|                              |            | Reference Dataset: BICM 2008 |       |            |           |            | User_A             |
|                              |            | Class                        | Water | Bare Earth | Vegetated | Intertidal |                    |
| Classed Data:<br>30-Jan-2009 | Water      | 97                           | 0     | 0          | 3         | 100        | 97.0%              |
|                              | Bare Earth | 14                           | 50    | 10         | 26        | 100        | 50.0%              |
|                              | Vegetated  | 26                           | 2     | 61         | 11        | 100        | 61.0%              |
|                              | Intertidal | 35                           | 4     | 3          | 58        | 100        | 58.0%              |
|                              | Total      | 172                          | 56    | 74         | 98        | 400        |                    |
|                              | Producer_A | 56.4%                        | 89.3% | 82.4%      | 59.2%     |            | 66.5%              |
|                              |            | Reference Dataset: BICM 2005 |       |            |           |            | User_A             |
|                              |            | Class                        | Water | Bare Earth | Vegetated | Intertidal |                    |
| Classed Data:<br>18-Oct-2005 | Water      | 98                           | 0     | 2          | 0         | 100        | 98.0%              |
|                              | Bare Earth | 46                           | 0     | 47         | 7         | 100        | 0.0%               |
|                              | Vegetated  | 46                           | 0     | 52         | 2         | 100        | 52.0%              |
|                              | Intertidal | 69                           | 0     | 18         | 13        | 100        | 13.0%              |
|                              | Total      | 259                          | 0     | 119        | 22        | 400        |                    |
|                              | Producer_A | 37.8%                        | 0.0%  | 43.7%      | 59.1%     |            | 40.8%              |
|                              |            | Reference Dataset: BICM 2004 |       |            |           |            | User_A             |
|                              |            | Class                        | Water | Bare Earth | Vegetated | Intertidal |                    |
| Classed Data:<br>31-Mar-2004 | Water      | 94                           | 0     | 4          | 2         | 100        | 94.0%              |
|                              | Bare Earth | 24                           | 64    | 3          | 9         | 100        | 64.0%              |
|                              | Vegetated  | 29                           | 4     | 66         | 1         | 100        | 66.0%              |
|                              | Intertidal | 48                           | 11    | 11         | 30        | 100        | 30.0%              |
|                              | Total      | 195                          | 79    | 84         | 42        | 400        |                    |
|                              | Producer_A | 48.2%                        | 81.0% | 78.6%      | 71.4%     |            | 63.5%              |

**Table S5.** Confusion matrices showing results of accuracy assessment—continued.

| Reference Dataset: BICM 1998 |            |       |            |           |            |       |
|------------------------------|------------|-------|------------|-----------|------------|-------|
| Classed Data:<br>17-Feb-1998 | Class      | Water | Bare Earth | Vegetated | Intertidal | Total |
|                              | Water      | 93    | 0          | 4         | 3          | 100   |
|                              | Bare Earth | 24    | 61         | 5         | 10         | 100   |
|                              | Vegetated  | 19    | 12         | 66        | 3          | 100   |
|                              | Intertidal | 24    | 35         | 35        | 6          | 100   |
|                              | Total      | 160   | 108        | 110       | 22         | 400   |
|                              | Producer_A | 58.1% | 56.5%      | 60.0%     | 27.3%      |       |
|                              | User_A     |       |            |           |            | 56.5% |

**Table S6.** Land-cover areas ( $\text{m}^2 \times 10^3$ ) for the entire northern Chandeleur Islands study area averaged for time periods corresponding to natural (storm) and anthropogenic (berm construction) events that affected historical land-cover changes (Figure 2). Single-factor Analysis of Variance (ANOVA) comparing land-cover extents for successive analysis periods were significant ( $p < 0.01$ ) for all comparisons except for comparison of intertidal extents for 1984-1998 compared with 1999-2005 ( $p = 0.74$ ) and comparison of vegetated extents for 2005-2010 compared with 2010-2019 ( $p = 0.09$ ).

| Time Period                 | Bare Earth<br>(Sand) | Vegetated          | Total Island <sup>1</sup> | Intertidal          | Barrier<br>Platform <sup>2</sup> |
|-----------------------------|----------------------|--------------------|---------------------------|---------------------|----------------------------------|
| 1984-1998<br>(pre-Georges)  | 4561.4 $\pm$ 896.3   | 10636 $\pm$ 1455.3 | 15197.4 $\pm$ 1582.8      | 8470.7 $\pm$ 2842.4 | 23668.2 $\pm$ 3186               |
| 1999-2005<br>(pre-Katrina)  | 3274 $\pm$ 665.7     | 7208.9 $\pm$ 975.8 | 10482.8 $\pm$ 1275.7      | 8177.9 $\pm$ 3389.9 | 18660.7 $\pm$ 4182.6             |
| 2005-2010<br>(post-Katrina) | 1279.9 $\pm$ 426.1   | 2265.3 $\pm$ 580.3 | 3545.2 $\pm$ 530.6        | 4084.8 $\pm$ 1679.5 | 7630 $\pm$ 1827.2                |
| 2010-2019<br>(post-berm)    | 3249.6 $\pm$ 730.4   | 2925.8 $\pm$ 964.9 | 6175.5 $\pm$ 1269.3       | 9772.3 $\pm$ 1942.6 | 15947.8 $\pm$ 2289.7             |

<sup>1</sup>Sand plus vegetated extents

<sup>2</sup>Sand plus vegetated plus intertidal extents

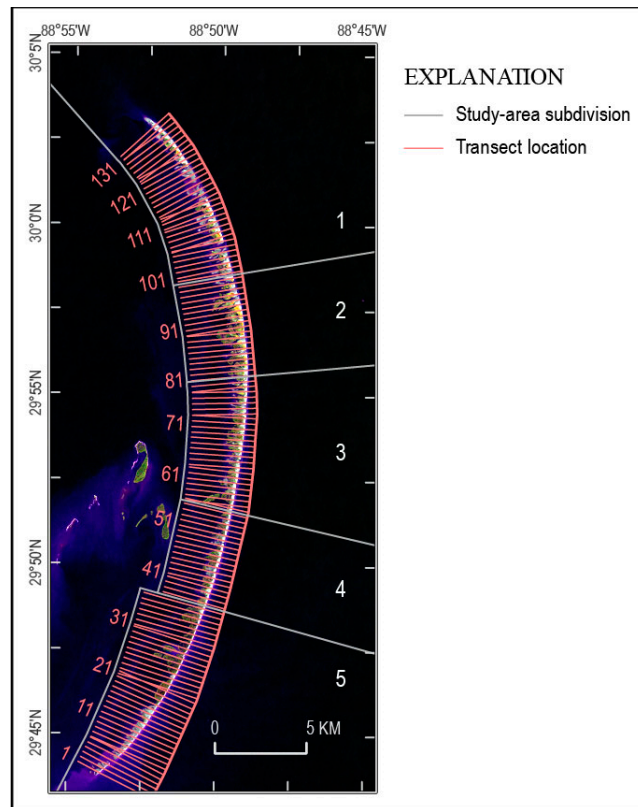

**Figure S1.** Study-area map showing cross-shore transects used to calculate barrier metrics and shoreline-change rates along the northern Chandeleur Islands. False-color Landsat 5 satellite image acquired 25-Mar-1984 is overlaid with study-area subdivisions; display uses bands 4,5,3.

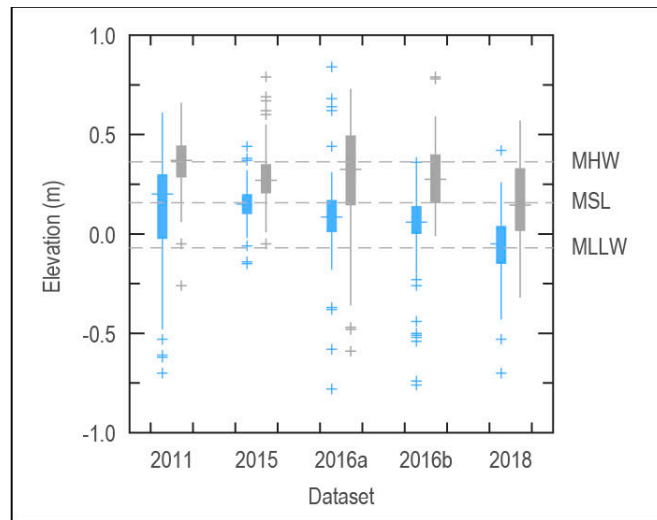

**Figure S2.** Boxplot showing distribution of elevations extracted from temporally consistent lidar datasets for intertidal “submerged” (blue boxes) and intertidal “emergent” (gray boxes) subclasses at the northern Chandeleur Islands. Dataset comparisons are 2011: 21-Feb-2011 Landsat 5 classed image with Feb-2011 lidar; 2015: 20-Mar-2015 Landsat 8 classed image with Feb-2015 lidar; 2016a: 6-Mar-2016 Landsat 8 source image with Jun-2016 lidar; 2016b: 22-Mar-2016 Landsat 8 classed image with Jun-2016 lidar; 2018: 10-Jan-2019 Landsat 8 classed image with Oct-2018 lidar. [Abbreviations: MLLW, mean lower low water; MSL, mean sea level; MHW, mean high water]

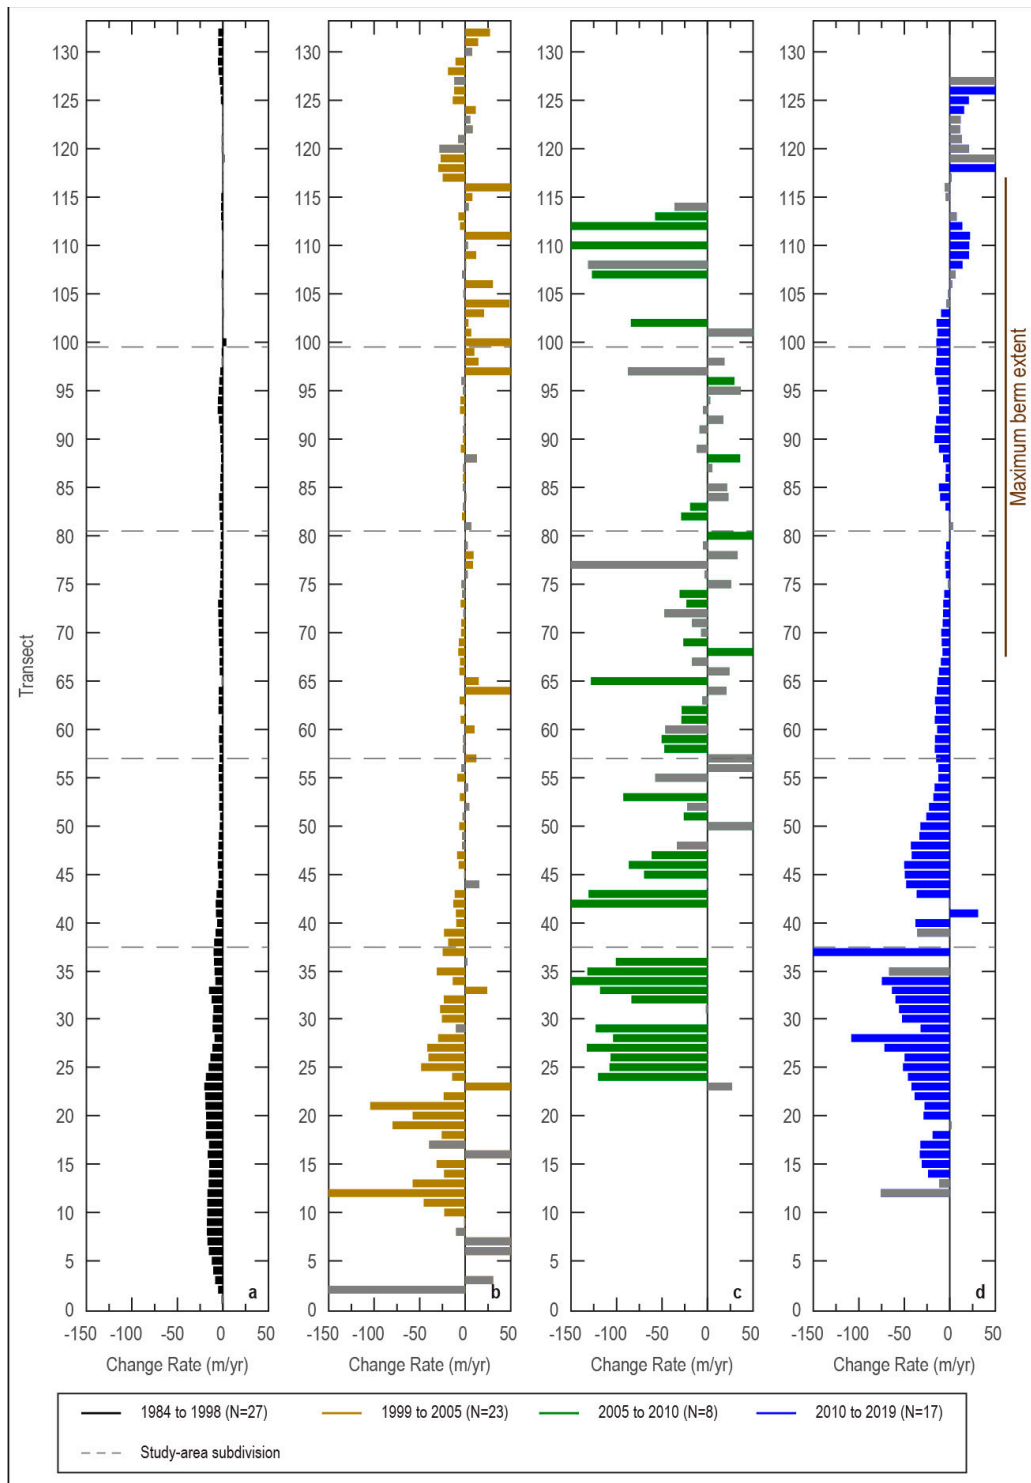

**Figure S3.** Linear-regression shoreline-change rates along cross-shore transects spaced 300 m alongshore at the northern Chandeleur Islands for (a) 25-Mar-1984 to 22-Apr-1998 (pre-Hurricane Georges), (b) 10-Jan-1999 to 24-Mar-2005 (pre-Hurricane Katrina), (c) 18-Oct-2005 to 18-Feb-2010 (post Hurricane Katrina), and (d) 3-Dec-2010 to 19-Jan-2019 (post-berm construction). Gray bars indicate rates for which  $p > 0.05$ . Dashed horizontal lines indicate study area subdivision boundaries. Rates for bars that extend beyond axis limits are labeled.

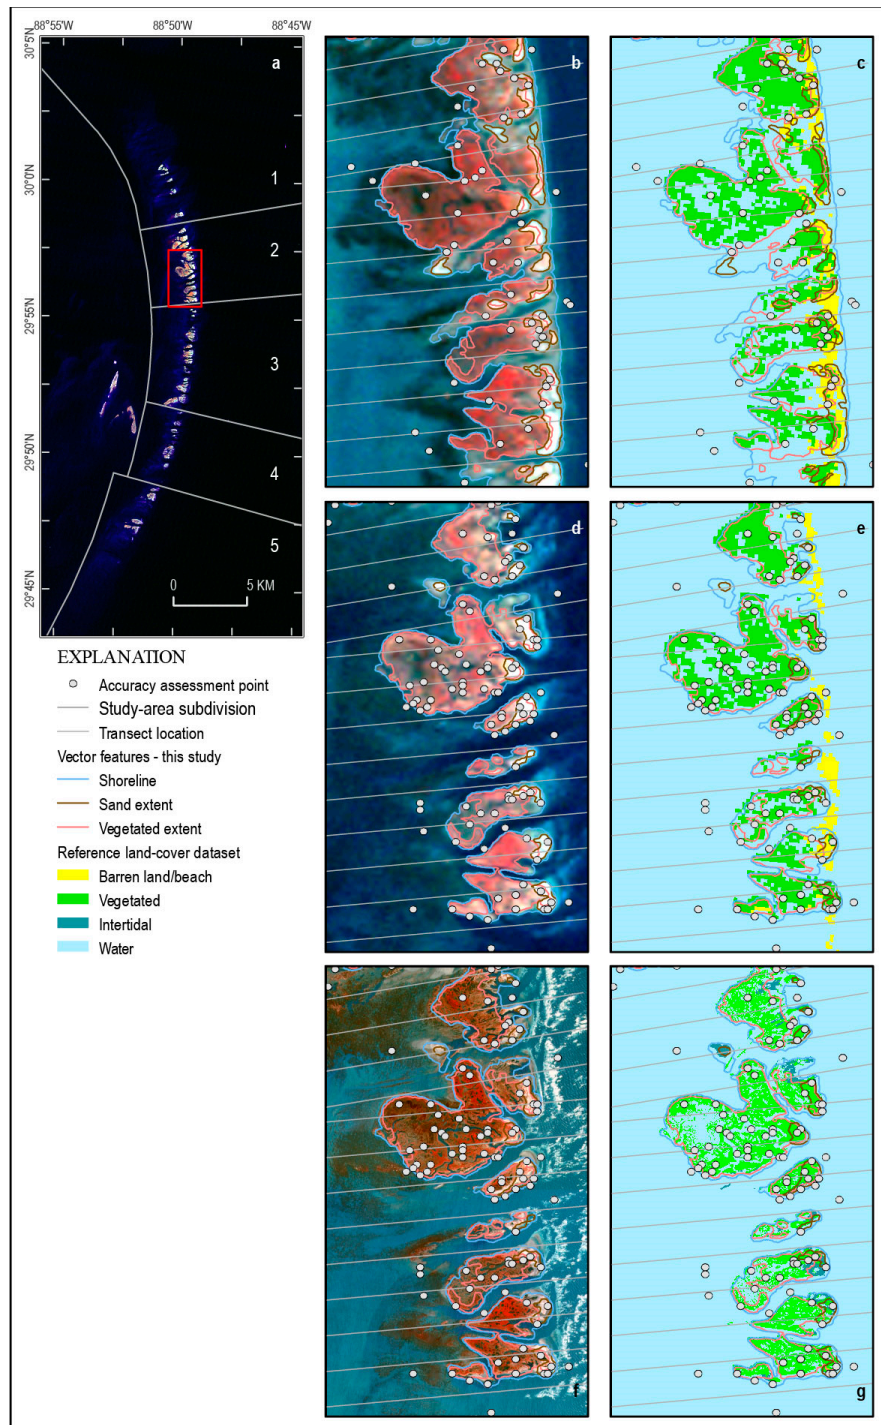

**Figure S4.** (a) Map of the northern Chandeleur Islands study area; inset boxes show location of panels b-e. False-color Landsat 5 satellite image acquired 18-Oct-2005 is overlaid with study-area subdivisions. (b-e) Vector feature extents show location of mapped barrier-platform and sand extents from Landsat 5 image acquired 18-Oct-2005 and randomly generated accuracy-assessment points compared to (b) Landsat 5 satellite image acquired 15-Oct-2004, (c) NLCD 2004 reference dataset, (d) Landsat 5 satellite image acquired 18-Oct-2005, (e) NLCD 2006 reference dataset, (f) BICM 2005 source color-infrared aerial imagery acquired 17-Nov-2005, and (g) BICM 2005 reference dataset. False-color images use bands 4,3,2 (Landsat) or 4,1,2 (aerial imagery).



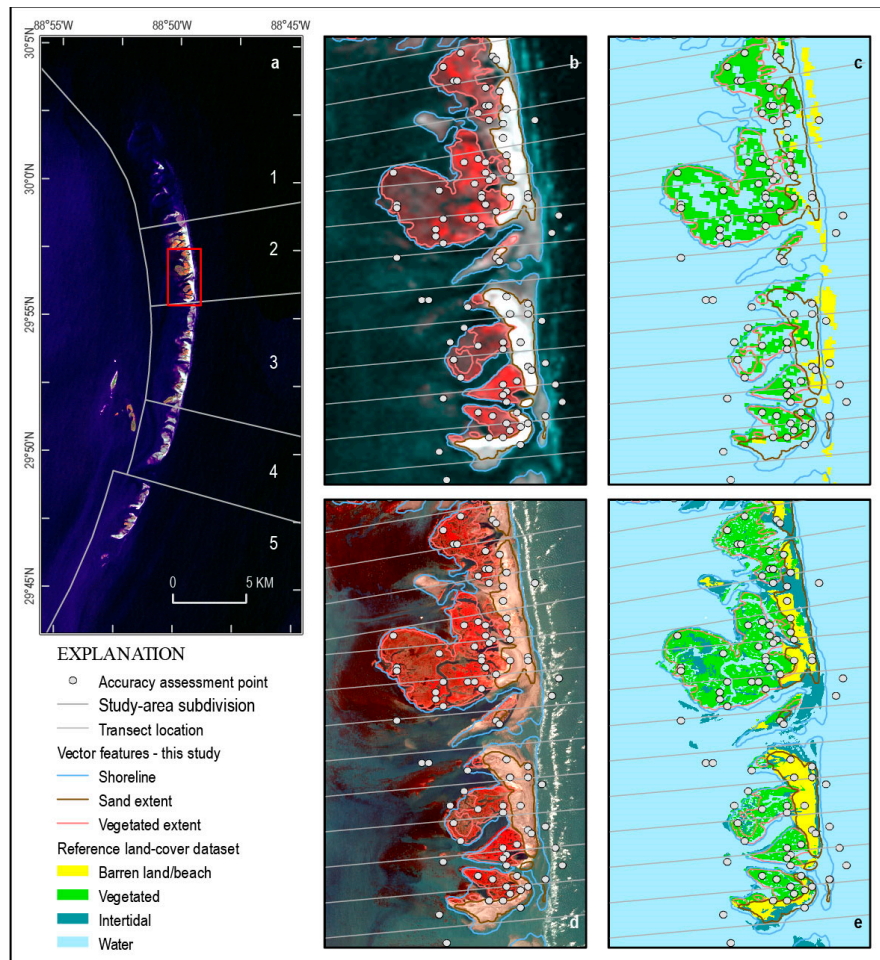

**Figure S5.** (a) Map of the northern Chandeleur Islands study area; inset boxes show location of panels b-e. False-color Landsat 5 satellite image acquired 30-Jan-2009 is overlaid with study-area subdivisions. (b-e) Vector feature extents show location of mapped barrier-platform and sand extents from Landsat 5 image acquired 30-Jan-2009 and randomly generated accuracy-assessment points (compared to (b) Landsat 5 satellite image acquired 30-Jan-2009, (c) NLCD 2008 reference dataset, (d) BICM 2008 source color-infrared aerial imagery acquired 28- and 29-Oct-2008, and (e) BICM 2008 reference dataset. False-color images use bands 4,3,2 (Landsat) or 4,1,2 (aerial imagery).



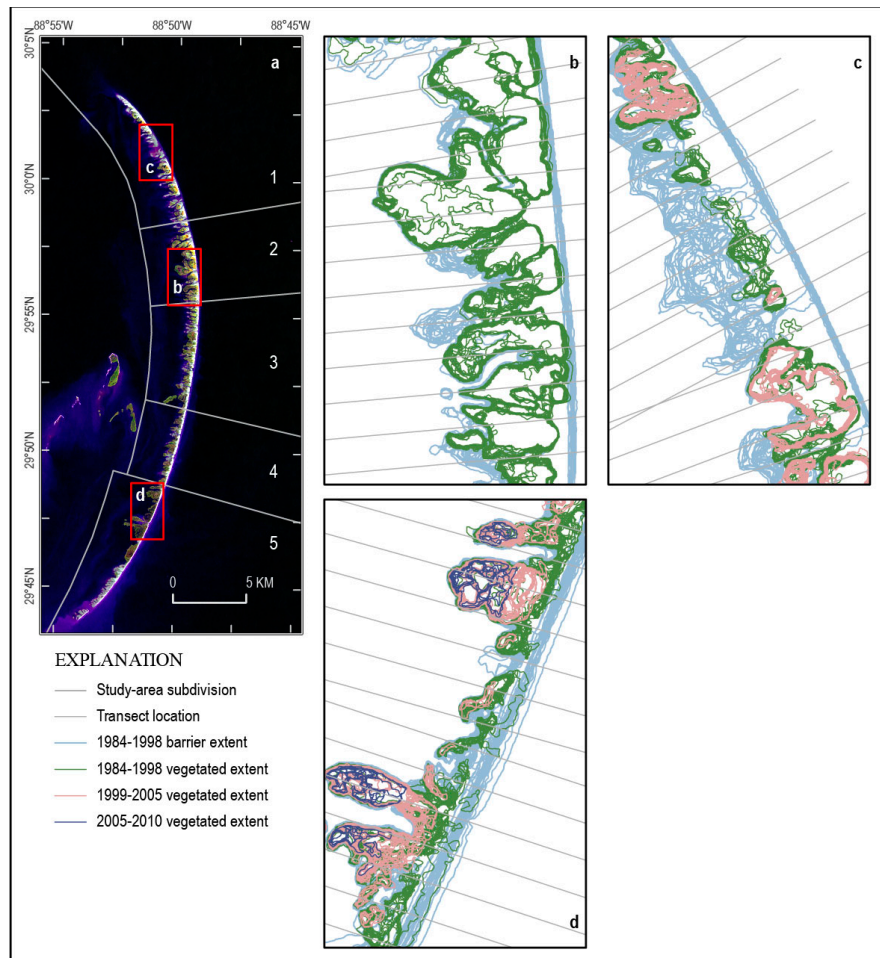

**Figure S6.** (a) Map of the northern Chandeleur Islands study area; inset boxes show location of panels b-d. False-color Landsat 5 satellite image acquired 25-Mar-1984 is overlaid with study-area subdivisions; display uses bands 4,5,3. Vector feature extents demonstrate (b) relative stability of the mapped back-barrier platform behind the stable marsh platform in subarea 2; (c) vegetation loss along a narrow, low persistence vegetated flat following Hurricane Georges; and (d) erosion and narrowing of the vegetated platform through landward erosion of the seaward edge.

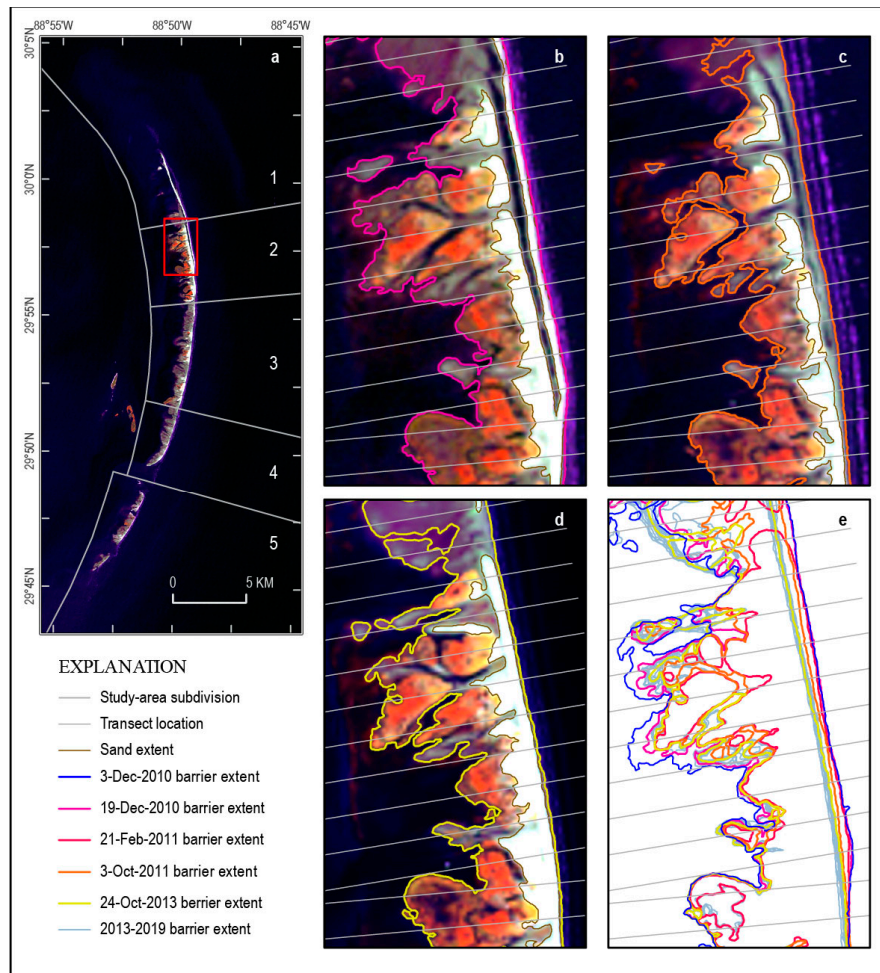

**Figure S7.** (a) Map of the northern Chandeleur Islands study area; inset box shows location of panels b-e. Landsat 5 satellite image acquired 19-Dec-2010 is overlaid with study-area subdivisions. (b-d) Vector feature extents show location of mapped barrier-platform and sand extents from Landsat 5 images acquired (b) 19-Dec-2010, (c) 3-Oct-2011 and (d) Landsat 8 image acquired 24-Oct-2013. (e) Vector barrier-platform extents demonstrate rapid landward translation of emplaced berm sediment between Dec-2010 and Oct-2011 and comparatively stable sea shoreline position since 2013. False-color images use bands 4,5,3 (Landsat 5) or 5,6,3 (Landsat 8).

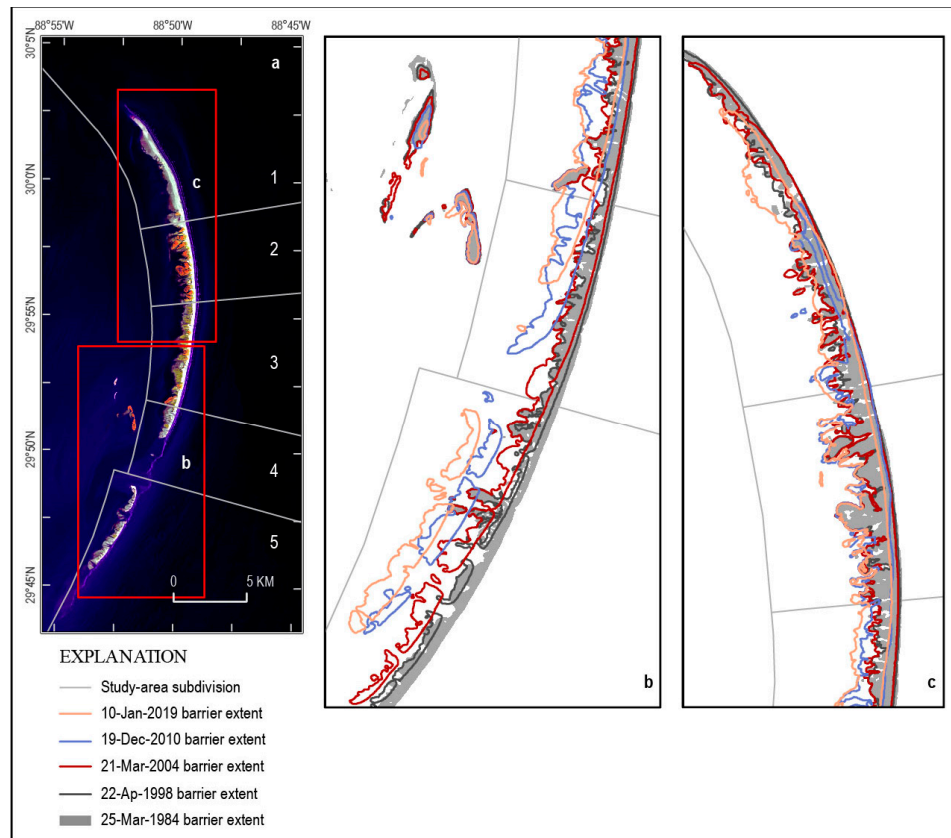

**Figure S8.** (a) Map of the northern Chandeleur Islands study area; inset box shows location of panels b-c. Landsat 5 satellite image acquired 19-Dec-2010 is overlaid with study-area subdivisions. Vector barrier-platform extents demonstrate (b) landward translation of the post-1984 barrier platform relative to the historical (1984) barrier footprint in the southern part of the study area and (c) relative stability of the barrier platform location in the central study area where backed by a persistent vegetated platform. In the northern study area (c), the barrier platform remerged after 2010, but mostly within the historical barrier footprint.
